# Supplementary material for: Negative Regulation of Age-Related Developmental Leaf Senescence by the IAOx Pathway, PEN1, and PEN3
Source: Front Plant Sci. 2019 Oct 8;10:1202. doi: 10.3389/fpls.2019.01202 (PMC6792297; doi:10.3389/fpls.2019.01202)
Supplement: Supplementary file 11 [file Table_3.xlsx]

## Sheet: Sheet1
AT#	Gene Name	Primer Name	Sequence	Product Size (bp)	Annealing Temperature, if different that 57oC	DNA Polymerase, if different than NEB Standard Taq
Amplifcation of Point Mutations, PCR Products Sequenced; used to determine genotypes in Figure 7
At3g11820	PEN1	pen1-1_RP	AGCTCATTCTCTCGCTTCCG
		pen1-1_LP	CGATCTAGCGCCTCGAGTTT
At1g59870	PEN3	pen3-1_RP	TACTAACTTTGGCCGTGTAACAGA
		pen3-1_LP	GCTGTTCCTTTTCTCTCAGGAC
At1g74710	SID2	sid2-1_F	TGATGCTCTGCAGCTTCAAT
		sid2-1_R	AAACAGCTGGAGTTGGATGC
Real-time qPCR primers, 61oC annealing temperature, qPCRBIO SyGreen Blue Mix, Hi-ROX, Supplemental Figure 1
At4g39950		CYP79B2_F	TTACCTCAAACTCTTCGGATCTCAC
		CYP79B2_R	AGCATCACTAAGGTTATAGCCACAA
At4g31500		SUR2_F	AGCTACTCAAAACTCAAGACCTCAA
		SUR2_R	ACCATACACATCTTCCTCATCTCAC
At5g57220		CYP81F2_F	TGATCTCTTCATTGCCTCTCGTAAG
		CYP81F2_R	CGGTTCCTATAGTGGTGTAATCGTA
At1g21100		IGMT1_F	AACGGAGTAAGATCCATCAAAC
		IGMT1_R	CTTTCTTCTCCTTCAAGGCAC
PCR Primers used for verification of camalexin biosynthesis mutants, Supplemental Figure 6
At3g26830	PAD3	PAD3_LP	TCGGTCAGTGAAGTCTACATGC
	SALK_026585	PAD3_RP	CCGGGAAAGAAATCAGAGAAC
At2g30750	CYP71A12	CYP71A12_F	AAGCCGTGATTAAAGAGGTG	600 bp (sequenced)
	CYP71A13	CYP71A2_R	AAATTGTAGGATATGCTTATTTTCT
At2g30770	CYP71A13	CYP71A13_F	ATTGGAAGAGAAGGATGCAAC
	SALK_105136	CYP71A13_R	GCAAGAACATTTAGAGGCGAG
		CYP71A13_RP	GCTAGGGTAAATTCTTGCAAATG
At5g26000	TGG1	TGG1RT-F6	CTTCTTATGCTCGCCTTTGTTTTTC	1.5 kb, cDNA
		TGG1RT-R6	GAGCGGAGTAGATCTTGGTTCGTAG
At5g25980	TGG2	TGG2RT_F2	CTTCTTGGGTTCGCCTTAGC	1.5 kb, cDNA
		TGG2RT_R2	TATCTTGGTTCTTGGTGGTATCTC
At1g45616	RLP7	RLP7-2_F	TCTGGTGAGATTCCTCCTGA	positive control, cDNA
		RLP7-2_R	CGGTTTGTGTTGGTGTTGAC
SALK_LBb1.3_plus			GGATTTTGCCGATTTCGGAACC
Amplification of cDNA; used to show full-length mRNA not present in mutants shown in Supplemental Figure 8
AT4G37430	cyp81F1-1	Salk_031939_F	CCTCTCACGTTACACACAAACC	560
		Salk_031939_R	TCAGTAGATTCGCCATCGCC
	cyp81F1-2	Salk_070814_F	ACCTCCAAAACGTCGTCTC	225
		Salk_070814_R	CATAGTAATCGCTTCCGCATC
	cyp81F1-3	Pst04610_F	ACGCGTCGTGGTCATAACAT	233
		Pst04610_R	CGTCTTTGCGGATGTGTTGG
AT5G57220	cyo81f2-1	Sail_694_G12_F	CGTGTCCTGGTGCGACTTTA	170
		Sail_694_G12_R	GGGACGTTTATGGCAAACGG
	cyp81f2-2	Salk_005861_F	CGTGCAATTACGAGCCGTTT	204
		Salk_005861_R	CCCTGGTGAAGGAGTTGGAC
	cyp81f2-3	Salkseq_487661_F	CAGACCGCATTTTCTGACC	283
		Salkseq_487661_R	AGTTTTGTGAGCAGCCGAC
AT1G21100	igmt1-1	Psh10821_F	ACTTCATGATTGGACCGACG	401	39.5	Phusion DNA Pol
		IGMT1_R2	GCTTGAAGACAAAGACATGCATGACC
	igmt1-2	Psh19554_F	TTGGACCGACGAAGATTGTGT	391	39.5	Phusion DNA Pol
		IGMT1_R2	GCTTGAAGACAAAGACATGCATGACC
AT1G21130	igmt4	IGMT4_F	GTAGTTGTTATAGAATTAGTC	259	39.5	Phusion DNA Pol
	Pst15123	IGMT4_R	GATGGAAATATATAATTAACGACG
AT1G32640	myc2-1	Salk_017005_F	TTCGTTTACCTTCATCGCC	180
		Salk_017005_R	CAAGCACAATAACCGAAAACC
	myc2-2	Salk_061267_F	TGACCCGATTGGAACACCTG	251
		Salk_061267_R	TCTCGCCGGATCTTGGTTTC
AT1G18570	myb51	GABI_228B12_F	TCTTACCTTAACCGCCACGG	216
		GABI_228B12_R	TCCTGGTAGTCCACGAGCTA
